# Supplementary material for: Multicenter Surveillance of Antimicrobial Resistance among Gram-Negative Bacteria Isolated from Bloodstream Infections in Ghana
Source: MDPI journal article supplement (doi:10.3390/antibiotics12020255), 2023-01-27
Supplement: s1 [file s1]

## Article

# Multicenter Surveillance of Antimicrobial Resistance among Gram-Negative Bacteria Isolated from Bloodstream Infections in Ghana

Eric S. Donkor <sup>1,†</sup>, Khitam Muhsen <sup>2,3,†</sup>, Sherry A. M. Johnson <sup>4</sup>, Fleischer C. N. Kotey <sup>1</sup>, Nicholas T. K. D. Dayie <sup>1</sup>, Patience B. Tetteh-Quarcoo <sup>1</sup>, Edem M. A. Tette <sup>5</sup>, Mary-Magdalene Osei <sup>1</sup>, Beverly Egyir <sup>6</sup>, Nicholas I. Nii-Trebi <sup>7</sup>, Godfred Owusu-Okyere <sup>1,8</sup>, Alex Owusu-Ofori <sup>9,10</sup>, Yonatan Amir <sup>2</sup>, Saritte Perlman <sup>2</sup>, Perdita Hilary Lopes <sup>11</sup>, Adjo Mfodwo <sup>11</sup>, Nicola C. Gordon <sup>12</sup>, Louise Gresham <sup>13</sup>, Mark Smolinski <sup>13</sup> and Dani Cohen <sup>2,3,\*</sup>

<sup>1</sup> Department of Medical Microbiology, University of Ghana Medical School, Accra 00233, Ghana

<sup>2</sup> Department of Epidemiology and Preventive Medicine, School of Public Health, Sackler Faculty of Medicine, Tel Aviv University, Tel Aviv, 6139001, Israel

<sup>3</sup> Middle East Consortium on Infectious Disease Surveillance (MECIDS), Jerusalem, 9149302, Israel.

<sup>4</sup> School of Veterinary Medicine, University of Ghana, Accra 00233, Ghana

<sup>5</sup> Department of Community Health, University of Ghana Medical School, Accra, 00233, P.O. Box KB 4236, Ghana

<sup>6</sup> Department of Bacteriology, Noguchi Memorial Institute for Medical Research, University of Ghana, Accra 00233, Ghana

<sup>7</sup> Department of Medical Laboratory Sciences, School of Biomedical & Allied Health Sciences, College of Health Sciences, University of Ghana, Accra 00233, Ghana

<sup>8</sup> National Public Health Reference Laboratory, Accra 00233, Ghana

<sup>9</sup> Department of Clinical Microbiology, Kwame Nkrumah University of Science and Technology, Kumasi 00233, Ghana

<sup>10</sup> Directorate of Laboratory Services, Komfo Anokye Teaching Hospital, Kumasi, Ghana

<sup>11</sup> Mott MacDonald, Accra, 00233, Ghana

<sup>12</sup> Mott MacDonald, N11 3JB London, UK

<sup>13</sup> Ending Pandemics, San Francisco, CA, USA

\* Correspondence: dancohen@tauex.tau.ac.il; Tel.: +972-3-6407081

† These authors contributed equally to this work.

## Supplementary Tables

**Supplementary Table S1.** Antimicrobial susceptibility of all Gram-negative blood isolates (N=334)

|                                              | <b>Resistant<br/>N (%)</b> | <b>Intermediate<br/>N (%)</b> | <b>Susceptible<br/>N (%)</b> |
|----------------------------------------------|----------------------------|-------------------------------|------------------------------|
| <b>Meropenem</b>                             | 92 (28.0%)                 | 12 (3.6%)                     | 225 (68.4%)                  |
| <b>Tetracycline</b>                          | 251 (76.1%)                | 4 (1.2%)                      | 75 (22.7%)                   |
| <b>Chloramphenicol</b>                       | 197 (59.7%)                | 13 (3.9%)                     | 120 (36.4%)                  |
| <b>Gentamicin</b>                            | 157 (53.8%)                | 7 (2.4%)                      | 128 (43.8%)                  |
| <b>Cefotaxime</b>                            | 256 (77.8%)                | 17 (5.2%)                     | 56 (17.0%)                   |
| <b>Azithromycin</b>                          | 138 (42.1%)                | 4 (1.2%)                      | 186 (56.7%)                  |
| <b>Ciprofloxacin</b>                         | 177 (55.3%)                | 30 (9.4%)                     | 113 (35.3%)                  |
| <b>Ceftriaxone</b>                           | 227 (73.7%)                | 7 (2.3%)                      | 74 (24.0%)                   |
| <b>Ampicillin</b>                            | 293 (89.3%)                | 7 (2.1%)                      | 28 (8.5%)                    |
| <b>Ceftazidime</b>                           | 178 (56.3%)                | 30 (9.5%)                     | 108 (34.2%)                  |
| <b>Ertapenem</b>                             | 146 (44.4%)                | 14 (4.3%)                     | 169 (51.4%)                  |
| <b>Nalidixic acid</b>                        | 209 (63.3%)                | 29 (8.8%)                     | 92 (27.9%)                   |
| <b>Trimethoprim-sulfamethoxazole</b>         | 236 (71.5%)                | 1 (0.3%)                      | 93 (28.2%)                   |
| <b>Multidrug resistant</b>                   | 290 (88.0%)                |                               |                              |
| <b>Susceptible to all antibiotics tested</b> |                            |                               | 5 (1.5%)                     |

**Supplementary Table S2. Antimicrobial susceptibility of *K. pneumoniae* and non-typhoidal *Salmonella* isolates**

|                                                                                | No. tested isolates | Resistant N (%) | Intermediate N (%) | Susceptible N (%) |
|--------------------------------------------------------------------------------|---------------------|-----------------|--------------------|-------------------|
| Antimicrobial susceptibility of <i>Klebsiella pneumoniae</i> blood isolates    |                     |                 |                    |                   |
| <b>Meropenem</b>                                                               | 84                  | 20 (23.8%)      | 4 (4.8%)           | 60 (71.4%)        |
| <b>Tetracycline</b>                                                            | 84                  | 75 (89.3%)      | 0 (0.0%)           | 9 (10.7%)         |
| <b>Chloramphenicol</b>                                                         | 84                  | 59 (70.2%)      | 1 (1.2%)           | 24 (28.6%)        |
| <b>Gentamicin</b>                                                              | 76                  | 63 (82.9%)      | 1 (1.3%)           | 12 (15.8%)        |
| <b>Cefotaxime</b>                                                              | 84                  | 72 (85.7%)      | 2 (2.4%)           | 10 (11.9%)        |
| <b>Azithromycin</b>                                                            | 84                  | 39 (46.4%)      | 2 (2.4%)           | 43 (51.2%)        |
| <b>Ciprofloxacin</b>                                                           | 84                  | 62 (73.8%)      | 8 (9.5%)           | 14 (16.7%)        |
| <b>Ceftriaxone</b>                                                             | 83                  | 70 (84.3%)      | 1 (1.2%)           | 12 (14.5%)        |
| <b>Ampicillin</b>                                                              | 83                  | 83 (100.0%)     | 0 (0.0%)           | 0 (0.0%)          |
| <b>Ceftazidime</b>                                                             | 84                  | 58 (69.0%)      | 9 (10.7%)          | 17 (20.2%)        |
| <b>Ertapenem</b>                                                               | 84                  | 25 (29.8%)      | 6 (7.1%)           | 53 (63.1%)        |
| <b>Nalidixic acid</b>                                                          | 84                  | 49 (58.3%)      | 13 (15.5%)         | 22 (26.2%)        |
| <b>Trimethoprim-sulfamethoxazole</b>                                           | 84                  | 72 (85.7%)      | 1 (1.2%)           | 11 (13.1%)        |
| <b>Multidrug resistant</b>                                                     | 84                  | 81 (96.4%)      |                    |                   |
| <b>Susceptible to all antibiotics tested</b>                                   | 84                  |                 |                    | 0 (0.0%)          |
| Antimicrobial susceptibility of Non-typhoidal <i>Salmonella</i> blood isolates |                     |                 |                    |                   |
| <b>Meropenem</b>                                                               | 18                  | 3 (16.7%)       | 1 (5.6%)           | 14 (77.8%)        |
| <b>Tetracycline</b>                                                            | 18                  | 6 (33.3%)       | 0 (0.0%)           | 12 (66.7%)        |
| <b>Chloramphenicol</b>                                                         | 18                  | 5 (27.8%)       | 0 (0.0%)           | 13 (72.2%)        |
| <b>Gentamicin</b>                                                              | 17                  | 4 (23.5%)       | 0 (0.0%)           | 13 (76.5%)        |
| <b>Cefotaxime</b>                                                              | 18                  | 7 (38.9%)       | 4 (22.2%)          | 7 (38.9%)         |
| <b>Azithromycin</b>                                                            | 17                  | 4 (23.5%)       | 0 (0.0%)           | 13 (76.5%)        |
| <b>Ciprofloxacin</b>                                                           | 18                  | 5 (27.8%)       | 0 (0.0%)           | 13 (72.2%)        |
| <b>Ceftriaxone</b>                                                             | 18                  | 4 (22.2%)       | 0 (0.0%)           | 14 (77.8%)        |
| <b>Ampicillin</b>                                                              | 18                  | 6 (33.3%)       | 0 (0%)             | 12 (66.7%)        |
| <b>Ceftazidime</b>                                                             | 18                  | 5 (27.8%)       | 1 (5.6%)           | 12 (66.7%)        |
| <b>Ertapenem</b>                                                               | 18                  | 3 (16.7%)       | 0 (0.0%)           | 15 (83.3%)        |
| <b>Nalidixic acid</b>                                                          | 18                  | 3 (16.7%)       | 0 (0.0%)           | 15 (83.3%)        |
| <b>Trimethoprim-sulfamethoxazole</b>                                           | 18                  | 6 (33.3%)       | 0 (0.0%)           | 12 (66.7%)        |
| <b>Multidrug resistant</b>                                                     | 18                  | 7 (38.9%)       |                    |                   |
| <b>Susceptible to all antibiotics tested</b>                                   | 18                  |                 |                    | 3 (16.7%)         |

**Supplementary Table S3: Antimicrobial susceptibility of *A. baumannii*, *E. coli* and *P. aeruginosa* isolates**

|                                                                               | No. tested isolates | Resistant N (%) | Intermediate N (%) | Susceptible N (%) |
|-------------------------------------------------------------------------------|---------------------|-----------------|--------------------|-------------------|
| Antimicrobial susceptibility of <i>Acinetobacter baumannii</i> blood isolates |                     |                 |                    |                   |
| <b>Meropenem</b>                                                              | 39                  | 12 (30.8%)      | 2 (5.1%)           | 25 (64.1%)        |
| <b>Tetracycline</b>                                                           | 40                  | 22 (55.0%)      | 2 (5.0%)           | 16 (40.0%)        |
| <b>Chloramphenicol</b>                                                        | 40                  | 35 (87.5%)      | 1 (2.5%)           | 4 (10.0%)         |
| <b>Gentamicin</b>                                                             | 31                  | 14 (45.2%)      | 1 (3.2%)           | 16 (51.6%)        |
| <b>Cefotaxime</b>                                                             | 40                  | 36 (90.0%)      | 1 (2.5%)           | 3 (7.5%)          |
| <b>Azithromycin</b>                                                           | 40                  | 17 (42.5%)      | -                  | 23 (57.5%)        |
| <b>Ciprofloxacin</b>                                                          | 34                  | 15 (44.1%)      | 7 (20.6%)          | 15 (44.1%)        |
| <b>Ceftriaxone</b>                                                            | 27                  | 24 (88.9%)      | 1 (3.7%)           | 2 (7.4%)          |
| <b>Ampicillin</b>                                                             | 39                  | 37 (94.9%)      | 1 (2.6%)           | 1 (2.6%)          |
| <b>Ceftazidime</b>                                                            | 33                  | 19 (57.6%)      | 4 (12.1%)          | 10 (30.3%)        |
| <b>Ertapenem</b>                                                              | 40                  | 36 (90.0%)      | 1 (2.5%)           | 3 (7.5%)          |
| <b>Nalidixic acid</b>                                                         | 40                  | 20 (50.0%)      | 7 (17.5%)          | 13 (32.5%)        |
| <b>Trimethoprim-sulfamethoxazole</b>                                          | 40                  | 23 (57.5%)      | -                  | 17 (42.5%)        |
| <b>Multidrug resistant</b>                                                    | 40                  | 39 (97.5%)      |                    |                   |
| <b>Susceptible to all antibiotics tested</b>                                  | 40                  |                 |                    | 0 (0.0%)          |
| Antimicrobial susceptibility of <i>E. coli</i> blood isolates                 |                     |                 |                    |                   |
| <b>Meropenem</b>                                                              | 88                  | 23 (26.1%)      | -                  | 65 (73.9%)        |
| <b>Tetracycline</b>                                                           | 88                  | 71 (80.7%)      | -                  | 17 (19.3%)        |
| <b>Chloramphenicol</b>                                                        | 88                  | 36 (40.9%)      | 5 (5.7%)           | 47 (53.4%)        |
| <b>Gentamicin</b>                                                             | 76                  | 34 (44.7%)      | 2 (2.6%)           | 40 (52.6%)        |
| <b>Cefotaxime</b>                                                             | 87                  | 64 (73.6%)      | 6 (6.9%)           | 17 (19.5%)        |
| <b>Azithromycin</b>                                                           | 88                  | 41 (46.6%)      | 1 (1.1%)           | 46 (52.3%)        |
| <b>Ciprofloxacin</b>                                                          | 88                  | 54 (61.4%)      | 9 (10.2%)          | 25 (28.4%)        |
| <b>Ceftriaxone</b>                                                            | 86                  | 67 (77.9%)      | 2 (2.3%)           | 17 (19.8%)        |
| <b>Ampicillin</b>                                                             | 88                  | 77 (87.5%)      | 3 (3.4%)           | 8 (9.1%)          |
| <b>Ceftazidime</b>                                                            | 88                  | 59 (67.0%)      | 8 (9.1%)           | 21 (23.9%)        |
| <b>Ertapenem</b>                                                              | 88                  | 26 (29.5%)      | 3 (3.4%)           | 59 (67.0%)        |
| <b>Nalidixic acid</b>                                                         | 88                  | 68 (77.3%)      | 3 (3.4%)           | 17 (19.3%)        |
| <b>Trimethoprim-sulfamethoxazole</b>                                          | 88                  | 63 (71.6%)      | -                  | 25 (28.4%)        |
| <b>Multidrug resistant</b>                                                    | 88                  | 83 (94.3%)      |                    |                   |
| <b>Susceptible to all antibiotics tested</b>                                  | 88                  |                 |                    | 2 (2.3%)          |
| Antimicrobial susceptibility of <i>Pseudomonas aeruginosa</i> blood isolates  |                     |                 |                    |                   |
| <b>Meropenem</b>                                                              | 25                  | 13 (52.0%)      | -                  | 12 (48.0%)        |
| <b>Tetracycline</b>                                                           | 25                  | 23 (92.0%)      | 1 (4.0%)           | 1 (4.0%)          |
| <b>Chloramphenicol</b>                                                        | 25                  | 19 (76.0%)      | 2 (8.0%)           | 4 (16.0%)         |
| <b>Gentamicin</b>                                                             | 25                  | 6 (24.0%)       | -                  | 19 (76.0%)        |
| <b>Cefotaxime</b>                                                             | 25                  | 21 (84.0%)      | -                  | 4 (16.0%)         |
| <b>Azithromycin</b>                                                           | 25                  | 9 (36.0%)       | -                  | 16 (64.0%)        |
| <b>Ciprofloxacin</b>                                                          | 25                  | 8 (32.0%)       | 2 (8.0%)           | 15 (60.0%)        |
| <b>Ceftriaxone</b>                                                            | 25                  | 20 (80.0%)      | 3 (12.0%)          | 2 (8.0%)          |
| <b>Ampicillin</b>                                                             | 25                  | 24 (96.0%)      | -                  | 1 (4.0%)          |
| <b>Ceftazidime</b>                                                            | 25                  | 10 (40.0%)      | -                  | 15 (60.0%)        |
| <b>Ertapenem</b>                                                              | 25                  | 21 (84.0%)      | 1 (4.0%)           | 3 (12.0%)         |
| <b>Nalidixic acid</b>                                                         | 25                  | 23 (92.0%)      | -                  | 2 (8.0%)          |
| <b>Trimethoprim-sulfamethoxazole</b>                                          | 25                  | 23 (92.0%)      | -                  | 2 (8.0%)          |
| <b>Multidrug resistant</b>                                                    | 25                  | 25 (100%)       |                    |                   |
| <b>Susceptible to all antibiotics tested</b>                                  | 25                  |                 |                    | 0 (0%)            |
